# Supplementary material for: Effects and Related Mechanisms of the Senolytic Agent ABT-263 on the Survival of Irradiated A549 and Ca9-22 Cancer Cells
Source: MDPI journal article supplement (doi:10.3390/ijms222413233), 2021-12-08
Supplement: s1 [file s1]

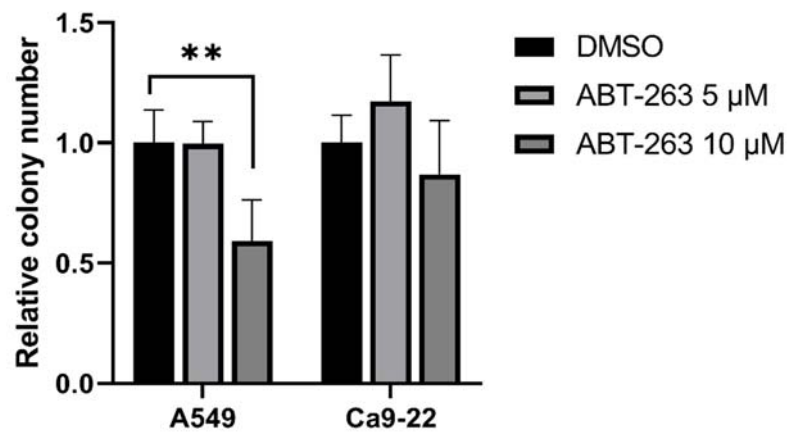

**Figure S1.** Effect of ABT-263 on colony-forming ability of non-irradiated cancer cells: The colony-forming ability of A549 and Ca9-22 cells in the presence of 5 or 10  $\mu$ M ABT-263 was examined. The results of relative colony number compared with dimethyl sulfoxide (DMSO) is shown. Data are presented as the mean  $\pm$  standard deviation of independent experiments. \*\* $p < 0.01$ .
